# Supplementary material for: Modeling CNS Involvement in Pompe Disease Using Neural Stem Cells Generated from Patient-Derived Induced Pluripotent Stem Cells
Source: MDPI journal article supplement (doi:10.3390/cells10010008), 2020-12-22
Supplement: s1 [file s1]

**Table S1: Antibodies used in immunocytochemical staining**

|                         | <b>Antibody</b>                             | <b>Dilution</b> | <b>Company Catalog Number and RRID</b>                   |
|-------------------------|---------------------------------------------|-----------------|----------------------------------------------------------|
| Pluripotency marker     | Mouse anti-SOX2                             | 1:50            | R&D Systems, Cat# MAB2018<br>RRID: AB_358009             |
| Pluripotency marker     | Mouse anti-SSEA4                            | 1:1000          | Cell Signaling Technology, Cat# 4755<br>RRID: AB_1264259 |
| Pluripotency marker     | Rabbit anti-NANOG                           | 1:400           | Cell Signaling Technology Cat# 4903<br>RRID: AB_10559205 |
| Pluripotency marker     | Mouse anti-TRA-1-60                         | 1:500           | Cell Signaling Technology Cat# 4746<br>RRID: AB_2119059  |
| Pluripotency marker     | Rabbit anti-OCT4A                           | 1:400           | Thermo Fisher Cat# A13998<br>RRID: AB_2534182            |
| Neural stem cell marker | Goat anti-SOX1                              | 1:20            | R&D Systems, Cat# AF3369<br>RRID: AB_2239879             |
| Neural stem cell marker | Mouse anti-Nestin                           | 1:200           | BD Biosciences Cat# 611658<br>RRID: AB_399176            |
| Secondary antibody      | Donkey anti-mouse IgG<br>(Alexa Fluor 488)  | 1:400           | Thermo Fisher, Cat# A21202<br>RRID: AB_141607            |
| Secondary antibody      | Donkey anti-Rabbit IgG<br>(Alexa Fluor 594) | 1:400           | Thermo Fisher, Cat# A21207,<br>RRID: AB_141637           |
| Secondary antibody      | Donkey anti-Goat IgG<br>(Alexa Fluor 488)   | 1:400           | Thermo Fisher, Cat# A11055,<br>RRID: AB_2534102          |
