# Supplementary material for: Modeling CNS Involvement in Pompe Disease Using Neural Stem Cells Generated from Patient-Derived Induced Pluripotent Stem Cells
Source: MDPI journal article supplement (doi:10.3390/cells10010008), 2020-12-22
Supplement: s1 [file s1]

**Fig. S1**  
**(A)**

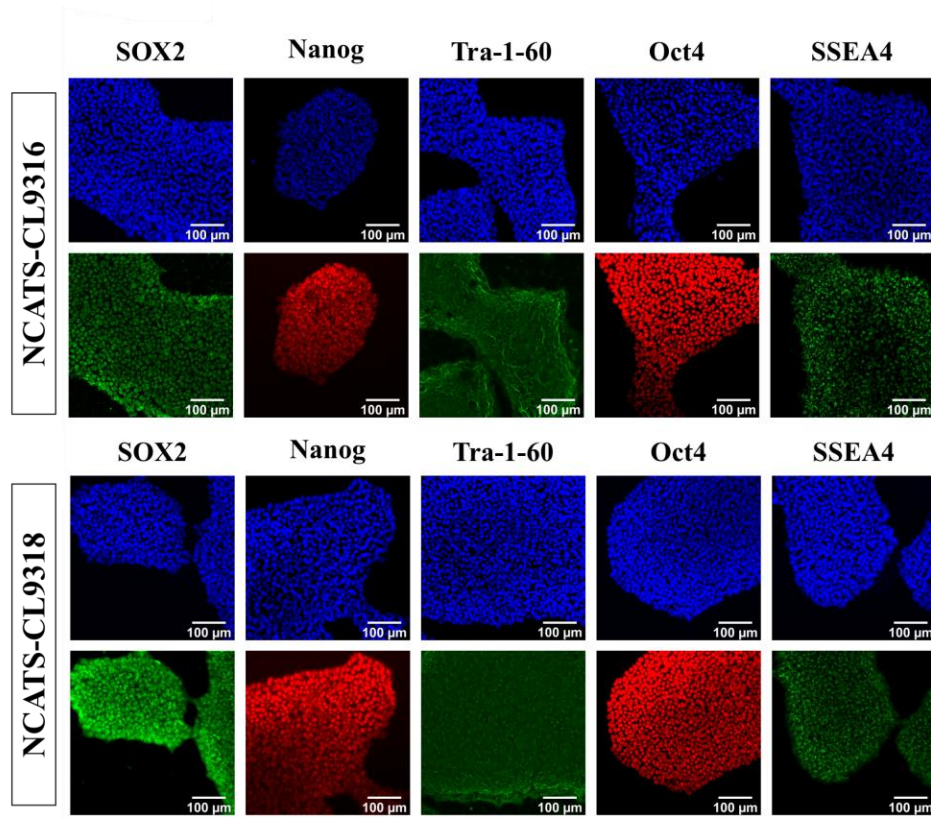

**(B)**

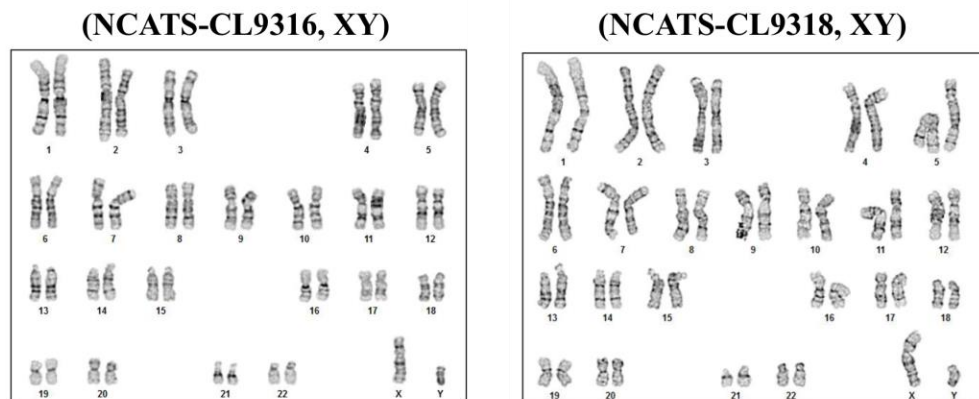

Fig. S1 Characterization of PD patient derived iPSCs. (A) Immunofluorescence images demonstrate the expression of pluripotent markers in iPSC lines NCATS-CL9316 and NCATS-CL9318. (B) Karyotype analysis for iPSC lines NCATS-CL9316 and NCATS-CL9318, indicating normal karyotypes.
