# Supplementary material for: Modeling CNS Involvement in Pompe Disease Using Neural Stem Cells Generated from Patient-Derived Induced Pluripotent Stem Cells
Source: MDPI journal article supplement (doi:10.3390/cells10010008), 2020-12-22
Supplement: s1 [file s1]

**Fig. S2**

**(A)**

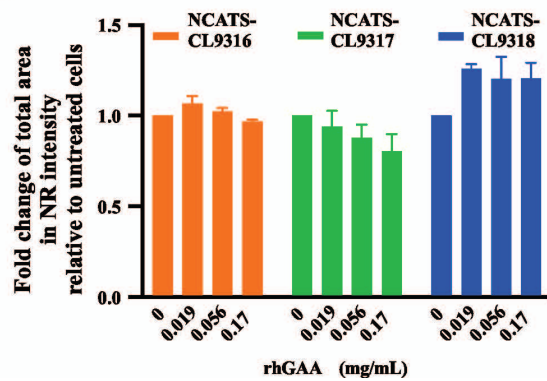

**(B)**

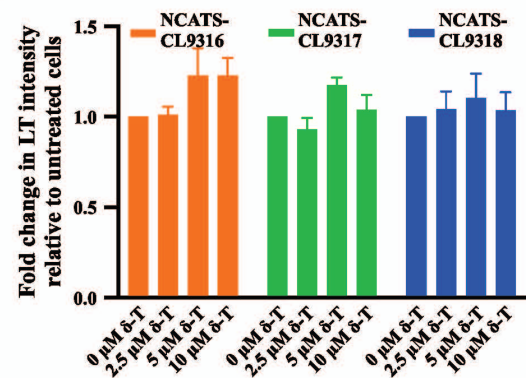

Fig. S2 Response to rhGAA and  $\delta$ -tocopherol treatment. (A) Bar graph presents the quantitation of Nile red (NR) staining after rhGAA treatment. (B) Bar graph presents the quantitation of Lysotracker (LT) staining after  $\delta$ -tocopherol ( $\delta$ -T) treatment.
